# Supplementary material for: A flexible graphene–carbon fiber composite electrode with high surface area-normalized capacitance
Source: Royal Society of Chemistry journal article supplement (doi:10.1039/c9se00099b), 2019-01-01
Supplement: c9se00099b1.pdf [file c9se00099b1.pdf]

## Supplementary Information

### **A flexible graphene-carbon fiber composite electrode with high surface area-normalized capacitance**

Xiaoming Sun, Hao Lu, Thomas E. Rufford, Rohit Ranganathan Gaddam, Timothy T. Duignan, Xin Fan, X. S. Zhao\*

School of Chemical Engineering, The University of Queensland, St Lucia, Brisbane, QLD 4072, Australia.

\*E-mail: [george.zhao@uq.edu.au](mailto:george.zhao@uq.edu.au)

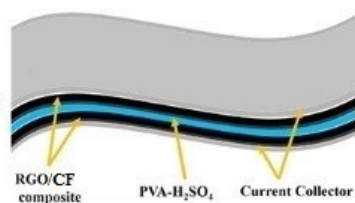

**Fig. S1** Schematic illustration of the all solid -state supercapacitors.

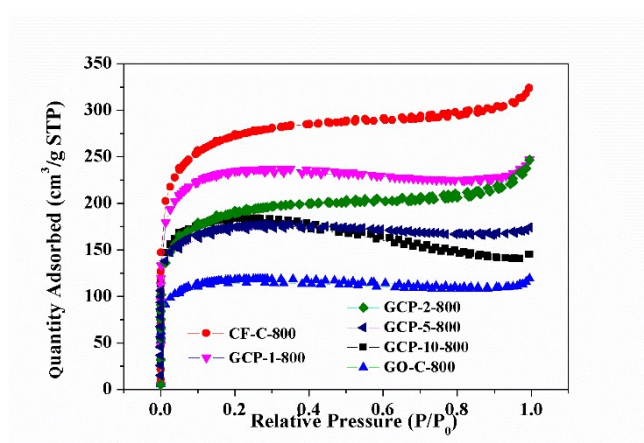

**Fig. S2** N<sub>2</sub> adsorption/desorption isotherms of GO-C-800, CP-C-800, GCP-1-800, GCP-2-800, GCP-5-800, and GCP-10-800.

**Table S1** Raman intensity ratio  $I_D/I_G$  of various samples

| Sample     | $I_D/I_G$ |
|------------|-----------|
| CP-C-800   | 0.94      |
| GCP-1-800  | 0.92      |
| GCP-2-800  | 0.91      |
| GCP-5-800  | 0.86      |
| GCP-10-800 | 0.85      |
| GO-C-800   | 0.82      |

We can provide an upper estimate for the optimal GO loading by determining at what point the total surface area of added GO will exceed the total available surface area of CP that it can adsorb to. At this point we can expect the benefits of adding GO to be negligible as any additional GO will simply aggregate. This point can be estimated by taking the total mass per unit area of CP (1.8 mg cm<sup>-2</sup>), multiply by its SSA (670 m<sup>2</sup> g<sup>-1</sup>) to give an effective SSA of 1.21 m<sup>2</sup> cm<sup>-2</sup> and then divide by the SSA of graphene (2630 m<sup>2</sup> g<sup>-1</sup>) to determine a maximum optimal loading of 0.46 mg cm<sup>-2</sup>.

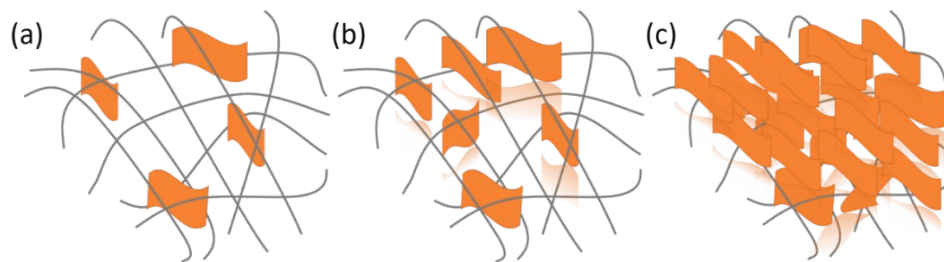

**Fig. S3** Illustration scheme for different GO loading with CF (a) low content, (b) optimized content, and (c) high content.

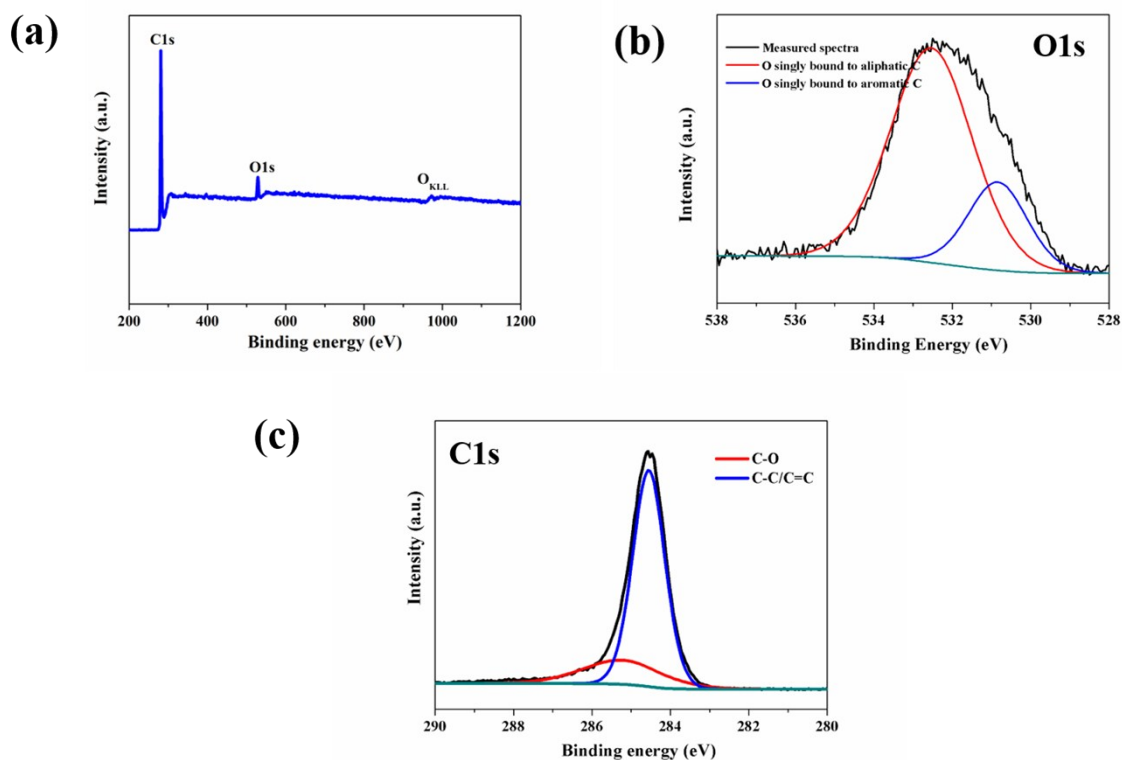

**Fig. S4**, XPS survey spectra of GCP-2-800 (a), deconvoluted O1s (b) and C1s spectra (c).

The XPS survey spectrum of GCP-2-800 is shown in Fig. S4. The two distinct peaks at 284.6 eV and 532.2 eV correspond to binding energies of C1s and O1s electrons, respectively. The oxygen heteroatoms contribute to pseudocapacitance, for which the charge discharge curves are not highly linear. Fig. S4b shows the deconvolution of O1s peaks, with two peaks corresponding to C-O single bond.<sup>1</sup> The C1s spectrum in Fig S4c was also fitted to two peaks located at 284.6 eV and 285.6 eV, corresponding to C-C/C=C and C-O, respectively.<sup>1</sup> Based on the above XPS analysis, the oxygen heteroatoms contributed to pseudocapacitance which may cause the charge-discharge curves are not highly linear.

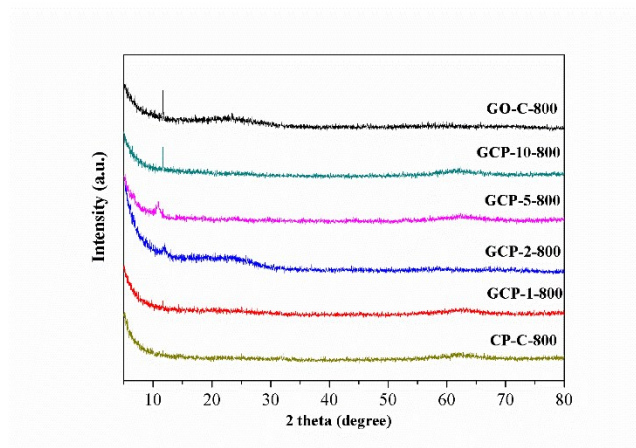

**Fig. S5** XRD patterns of GO-C-800, GCP-1-800, GCP-2-800, GCP-5-800, GCP-10-800 and CP-C-800.

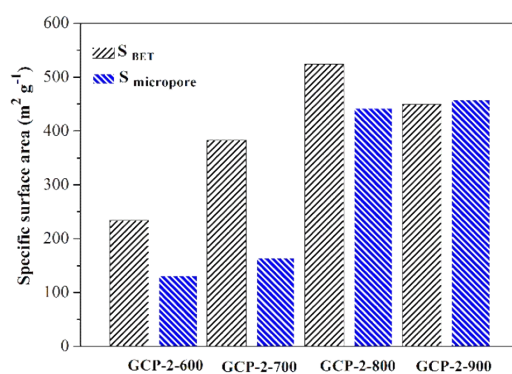

**Fig. S6** SSA and micropore surface area of GCP-2-600, GCP-2-700 and GCP-2-800, GCP-2-900.

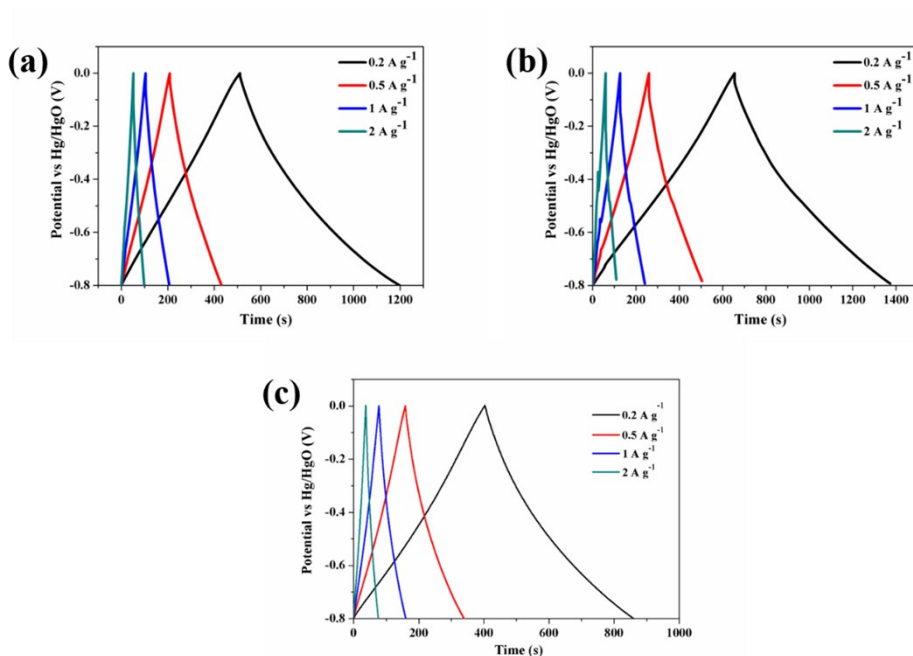

**Fig. S7** GCD curves of (a) GCP-2-600 and (b) GCP-2-700 in 6 M KOH aqueous electrolyte, and (c) GCP-2-900 in 6 M KOH aqueous electrolyte.

**Table S2** Comparison of the electrochemical properties of graphene-cellulose composite materials

| Materials                                                                    | Preparation method               | Capacitance in aqueous electrolyte                                      | Capacitance in gel electrolyte                                                         | Cycling stability %, (NO. of cycles)                          |
|------------------------------------------------------------------------------|----------------------------------|-------------------------------------------------------------------------|----------------------------------------------------------------------------------------|---------------------------------------------------------------|
| RGO/CF composite <b>(this work)</b>                                          | Impregnation + KOH activation    | 220 F g <sup>-1</sup> at 0.2 A g <sup>-1</sup>                          | 49 mF cm <sup>-2</sup> at 2 mV s <sup>-1</sup> in PVA-H <sub>2</sub> SO <sub>4</sub>   | 97.6%, (10,000) at 1 A g <sup>-1</sup> in aqueous electrolyte |
| Graphene cellulose paper membrane <sup>2</sup>                               | Vacuum filtration                | 120 F g <sup>-1</sup> at 1 mV s <sup>-1</sup> of graphene               | 46 mF cm <sup>-2</sup> at 2 mV s <sup>-1</sup> in PVA-H <sub>2</sub> SO <sub>4</sub>   | >99%,(5,000) at 50 mV s <sup>-1</sup> in aqueous electrolyte  |
| Graphene cellulose tissue composite <sup>3</sup>                             | Vacuum filtration                | 60 mF cm <sup>-2</sup> at 0.5 A cm <sup>-2</sup>                        | 54 mF cm <sup>-2</sup> at 80 mA cm <sup>-2</sup> in PVA-H <sub>2</sub> SO <sub>4</sub> | 95%, (5,000) at 5 A g <sup>-1</sup> in aqueous electrolyte    |
| Graphite/cellulose paper <sup>4</sup>                                        | Directly drawing                 | 23 mF cm <sup>-2</sup> at 0.2 A g <sup>-1</sup> (23 F g <sup>-1</sup> ) | -                                                                                      | >90%,(15,000) at 5 A g <sup>-1</sup> in aqueous electrolyte   |
| PANI-RGO/CP composite paper <sup>5</sup>                                     | Dipping and drying +hydrothermal | 464 F g <sup>-1</sup> at 1 A g <sup>-1</sup>                            | 224 F g <sup>-1</sup> at 0.1 A g <sup>-1</sup> in PVA-H <sub>2</sub> SO <sub>4</sub>   | 89%, (1,000) at 0.1 A g <sup>-1</sup> in gel electrolyte)     |
| Bacterial cellulose paper and CNT <sup>6</sup>                               | Vacuum filtration                | -                                                                       | 20.2 mF cm <sup>-2</sup> at 1 A g <sup>-1</sup> in ion gel                             | >99.5%, (5,000) at 10 A g <sup>-1</sup> in gel electrolyte    |
| Bacterial cellulose and graphene oxide <sup>7</sup>                          | Cross-linking                    | 160 F at 0.4 A g <sup>-1</sup>                                          | -                                                                                      | 90.3% (2000) at 0.4 A g <sup>-1</sup> in aqueous electrolyte  |
| Bacterial cellulose and reduced graphene oxide <sup>8</sup>                  | Bio assembly                     | -                                                                       | 65.3 F g <sup>-1</sup> at 5 mV s <sup>-1</sup> in PVA-H <sub>3</sub> PO <sub>4</sub>   | 88% (5000) at 1 A g <sup>-1</sup> in gel electrolyte          |
| Cellulose nanofibril and reduced graphene oxide/carbon nanotube <sup>9</sup> | Freeze drying +heating           | -                                                                       | 252 F g <sup>-1</sup> at 0.5 A g <sup>-1</sup> in PVA-H <sub>2</sub> SO <sub>4</sub>   | 99.5% (1000) at 1 A g <sup>-1</sup> in gel electrolyte        |

## References

1. Luong, N. D.; Pahimanolis, N.; Hippel, U.; Korhonen, J. T.; Ruokolainen, J.; Johansson, L.-S.; Nam, J.-D.; Seppälä, J., Graphene/cellulose nanocomposite paper with high electrical and mechanical performances. *Journal of Materials Chemistry* **2011**, *21* (36), 13991-13998.
2. Weng, Z.; Su, Y.; Wang, D.-W.; Li, F.; Du, J.; Cheng, H.-M., Graphene–Cellulose Paper Flexible Supercapacitors. *Advanced Energy Materials* **2011**, *1* (5), 917-922.
3. Sevilla, M.; Ferrero, G. A.; Fuertes, A. B., Graphene-cellulose tissue composites for high power supercapacitors. *Energy Storage Materials* **2016**, *5*, 33-42.
4. Zheng, G.; Hu, L.; Wu, H.; Xie, X.; Cui, Y., Paper supercapacitors by a solvent-free drawing method. *Energy & Environmental Science* **2011**, *4* (9), 3368-3373.
5. Liu, L.; Niu, Z.; Zhang, L.; Zhou, W.; Chen, X.; Xie, S., Nanostructured Graphene Composite Papers for Highly Flexible and Foldable Supercapacitors. *Advanced Materials* **2014**, *26* (28), 4855-4862.
6. Kang, Y. J.; Chun, S.-J.; Lee, S.-S.; Kim, B.-Y.; Kim, J. H.; Chung, H.; Lee, S.-Y.; Kim, W., All-Solid-State Flexible Supercapacitors Fabricated with Bacterial Nanocellulose Papers, Carbon Nanotubes, and Triblock-Copolymer Ion Gels. *ACS Nano* **2012**, *6* (7), 6400-6406.
7. Liu, Y.; Zhou, J.; Zhu, E.; Tang, J.; Liu, X.; Tang, W., Facile synthesis of bacterial cellulose fibres covalently intercalated with graphene oxide by one-step cross-linking for robust supercapacitors. *Journal of Materials Chemistry C* **2015**, *3* (5), 1011-1017.
8. Guan, F.; Chen, S.; Sheng, N.; Chen, Y.; Yao, J.; Pei, Q.; Wang, H., Mechanically robust reduced graphene oxide/bacterial cellulose film obtained via biosynthesis for flexible supercapacitor. *Chemical Engineering Journal* **2019**, *360*, 829-837.
9. Zheng, Q.; Cai, Z.; Ma, Z.; Gong, S., Cellulose Nanofibril/Reduced Graphene Oxide/Carbon Nanotube Hybrid Aerogels for Highly Flexible and All-Solid-State Supercapacitors. *ACS Applied Materials & Interfaces* **2015**, *7* (5), 3263-3271.
